# Supplementary material for: Gene expression changes in damaged osteoarthritic cartilage identify a signature of non-chondrogenic and mechanical responses
Source: PubMed Central journal article supplement (PMC4989048; doi:10.1016/j.joca.2016.03.007), 2016-08
Supplement: mmc1.pdf [file mmc1.pdf]

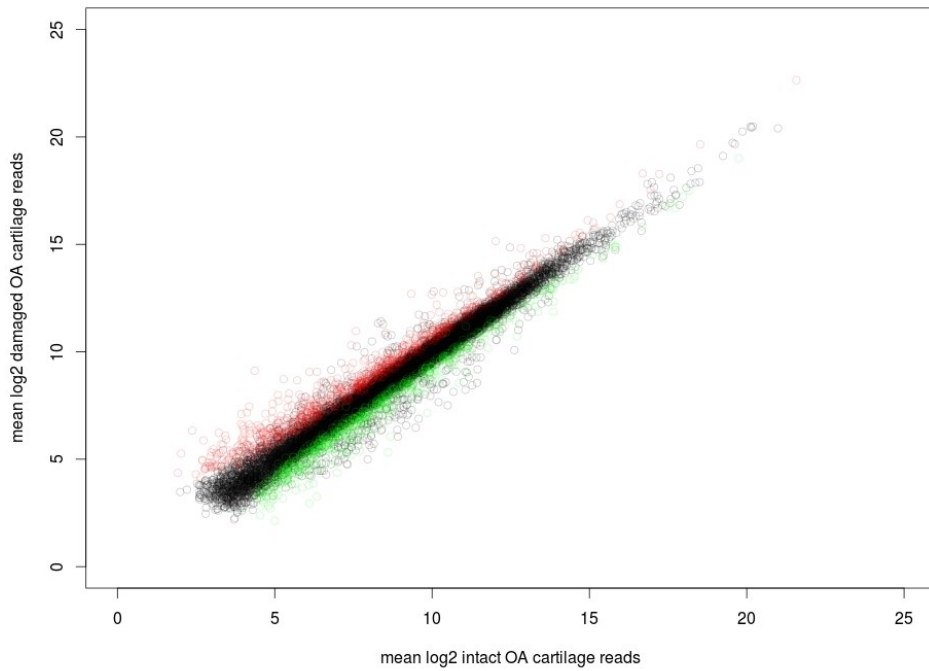

**Supplementary Figure 1. Log2 RNA-seq reads of intact vs damaged cartilage.** Of the 17160 genes included in the analysis, 4.8% were significantly up-regulated (red) while 4.3% were significantly down-regulated (green). (fold change  $\geq 1.5$ , adjusted p-value  $\leq 0.1$ ).

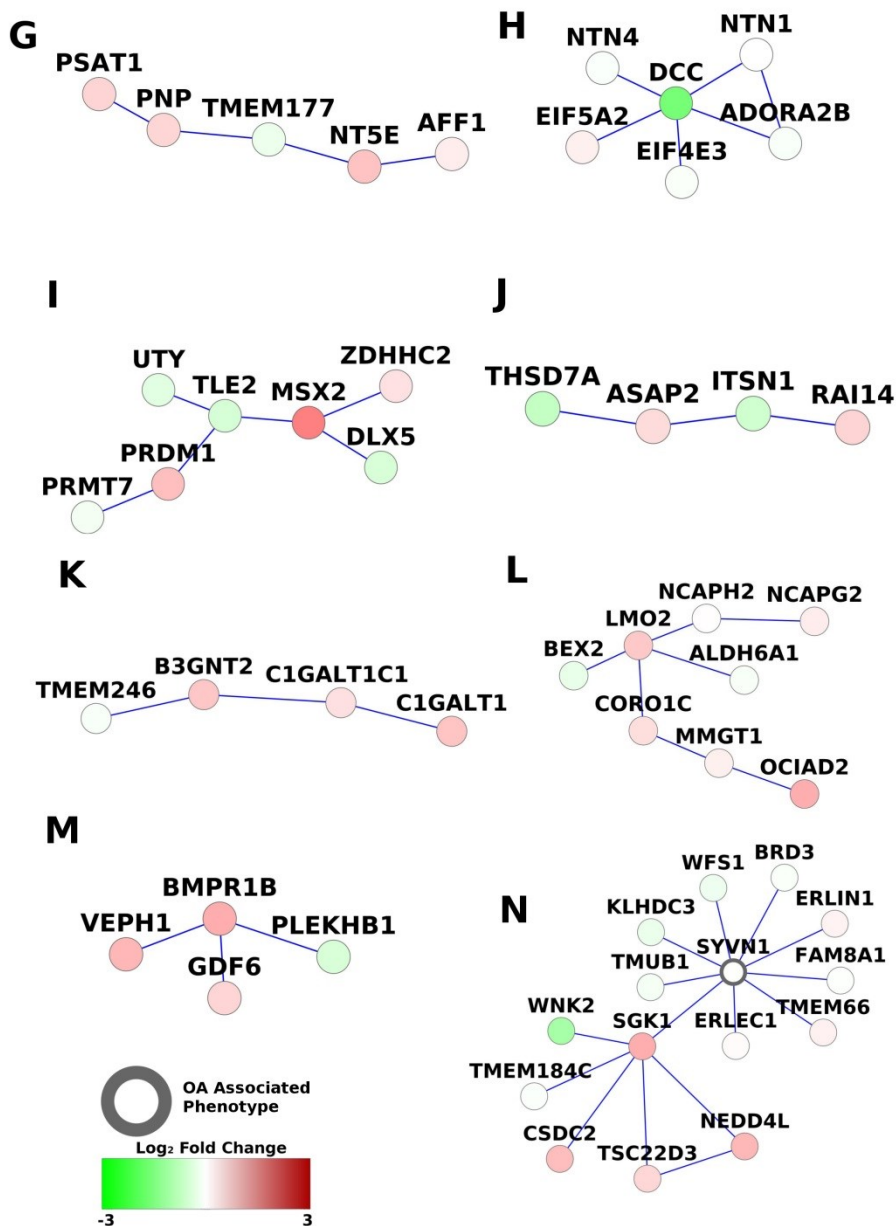

**Supplementary Figure 2. PhenomeExpress Analysis.** Network analysis incorporating cross-species gene-phenotype associations, identified 23 differentially expressed networks based on direct protein-protein interactions in the damaged cartilage. Sub-networks included; pyridine-containing compound biosynthetic (**G**), process anterior/posterior axon guidance (**H**), organ morphogenesis (**I**), regulation of Ras GTPase activity (**J**), O-glycan processing (**K**), chromosome condensation (**L**), ovarian cumulus expansion (**M**), ER-associated ubiquitin-dependent protein catabolic process (**N**). The fold change of the proteins is shown by the node colour and OA associated phenotype annotated proteins used to generate the sub-networks are shown with a black border.

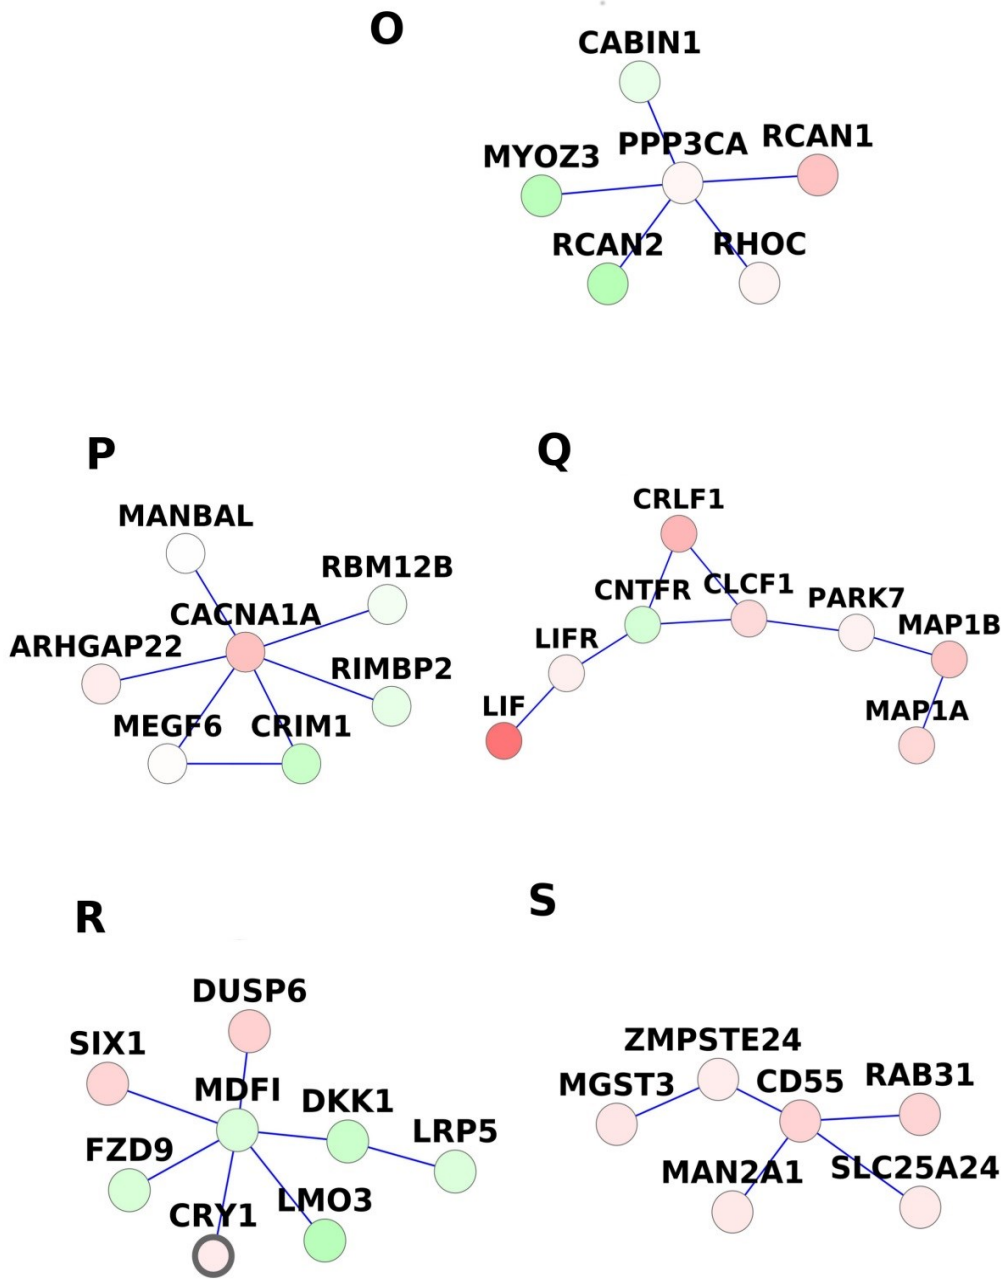

**Supplementary Figure 2 Cont. PhenomeExpress Analysis.** calcineurin-NFAT signaling cascade (**O**), acetylcholine secretion (**P**), neurotransmission (**Q**), positive regulation of tyrosine phosphorylation of Stat3 protein (**R**), regionalization, CAAX-box protein processing (**S**).

**T**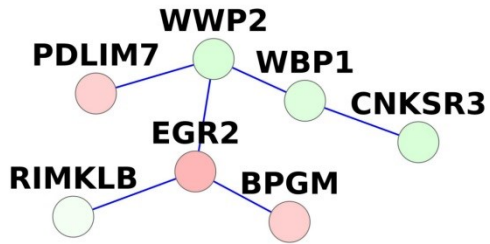**U**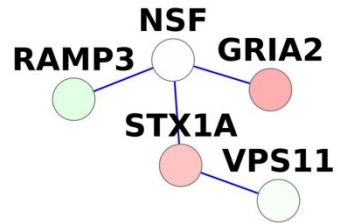**V**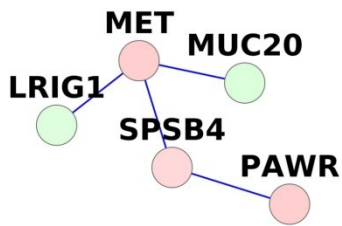**W**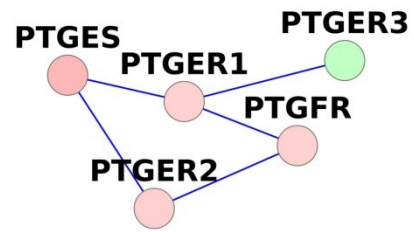

**Supplementary Figure 2 Cont. PhenomeExpress Analysis.** rhombomere formation (**T**), positive regulation of receptor recycling (**U**), hepatocyte growth factor receptor signaling pathway (**V**), response to lipopolysaccharide (**W**).

A

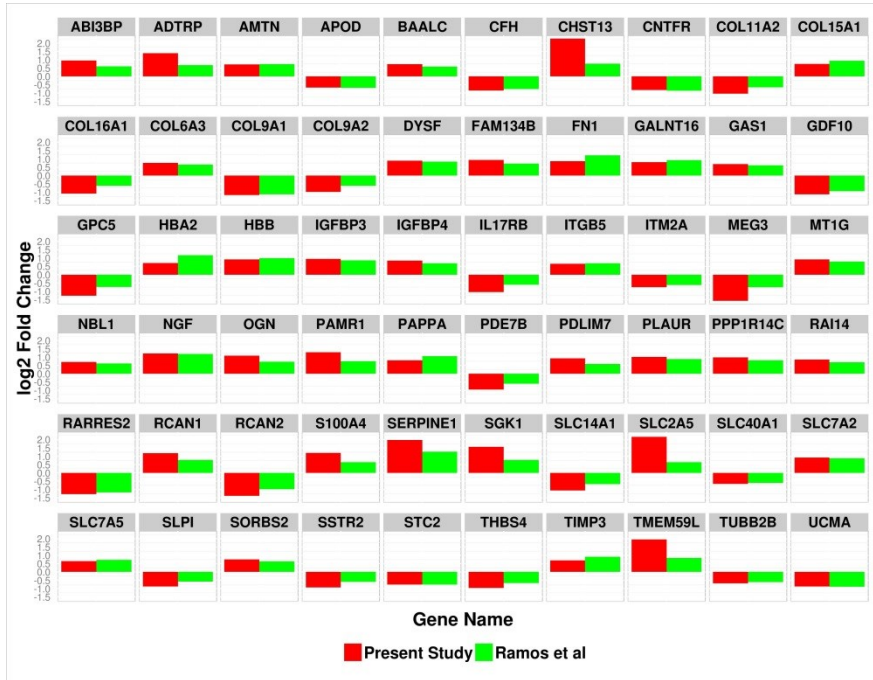

B

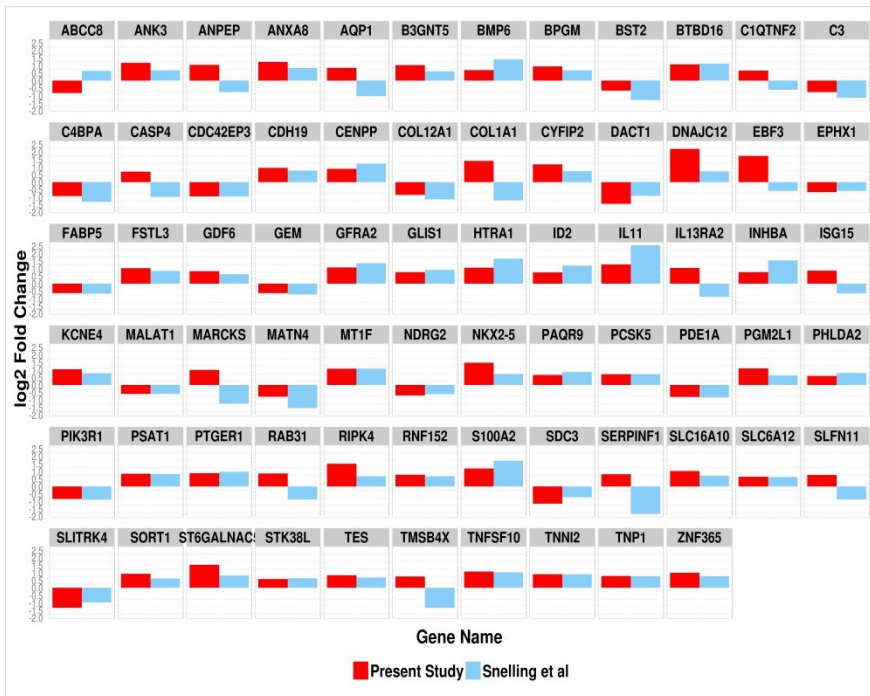

**Supplementary Figure 3. Comparison of intact vs damaged OA cartilage transcriptome studies.** The log<sub>2</sub> fold change of the differentially expressed genes in the three comparable datasets, the present study compared to Ramos *et al* (A) and Snelling *et al* (B).

**Supplementary Table 1.** Primer sequences used in real-time PCR for RNA-seq validation.

| <b>Gene</b> | <b>Forward Primer</b>          | <b>Reverse Primer</b>          |
|-------------|--------------------------------|--------------------------------|
| GAPDH       | 5'-AGGGCTGCTTTTAACTCTGGT-3'    | 5'-CCCCACTTGATTTTGGAGGGA-3'    |
| ACTB        | 5'-CCACCATGTACCCAGGCATT-3'     | 5'-CACATCTGCTGGAAGGTGGA-3'     |
| COL1A2      | 5'-GGCTACCCAACCTGCCTTCA-3'     | 5'GCAGTGGTAGGTGATGTTCTGAGA3'   |
| COL2A1      | 5'GGCAATAGCAGGTTACGTACA-3'     | 5'-CGATAACAGTCTTGCCCCACTT-3'   |
| ACAN        | 5'-TCGAGGACAGCGAGGCC-3'        | 5'-TCGAGGGGTAGCGGTAGAGA-3'     |
| SOX9        | 5'-GACTTCCGCGACGTGGAC-3'       | 5'-GTTGGGCGGCAGGTACTG-3'       |
| TNFAIP6     | 5'-CTCCATATGGCTTGAACGAGCAGC-3' | 5'-GCCCTTAGCCATCCATCCAGCA-3'   |
| TNFRSF11B   | 5'-TCCTGGATTTGGAGTGGTGC-3'     | 5'-CTCCTCACACAGGGTAACATCTAT-3' |
| HAPLN1      | 5'-ACTTGAGAGCATCCGAACTCC-3'    | 5'-GGGGGCCATTTTCTGCTTG-3'      |

**Supplementary Table 3.** The top 50 up-regulated genes in damaged cartilage relative to intact cartilage

| Gene Name                                                                                     | Gene Symbol   | FC   | Adjusted p-value       |
|-----------------------------------------------------------------------------------------------|---------------|------|------------------------|
| Family with sequence similarity 167, member A                                                 | FAM167A       | 7.49 | 1.29x10 <sup>-34</sup> |
| Leukemia inhibitory factor                                                                    | LIF           | 6.51 | 1.24x10 <sup>-21</sup> |
| Msh homeobox 2                                                                                | MSX2          | 5.62 | 2.11x10 <sup>-19</sup> |
| Carbohydrate (chondroitin 4) sulfotransferase 13                                              | CHST13        | 4.83 | 1.67x10 <sup>-12</sup> |
| Tumor necrosis factor, alpha-induced protein 6                                                | TNFAIP6       | 4.67 | 1.85x10 <sup>-19</sup> |
| DnaJ (Hsp40) homolog, subfamily C, member 12                                                  | DNAJC12       | 4.63 | 2.95x10 <sup>-13</sup> |
| RP11-267A15.1                                                                                 | RP11-267A15.1 | 4.50 | 5.17x10 <sup>-12</sup> |
| Solute carrier family 2 (facilitated glucose/fructose transporter), member 5                  | SLC2A5        | 4.49 | 1.27x10 <sup>-35</sup> |
| RP11-536I6.2                                                                                  | RP11-536I6.2  | 4.16 | 3.81x10 <sup>-10</sup> |
| Forkhead box F1                                                                               | FOXF1         | 3.98 | 2.41x10 <sup>-11</sup> |
| Serpin peptidase inhibitor, clade E (nexin, plasminogen activator inhibitor type 1), member 1 | SERPINE1      | 3.94 | 1.81x10 <sup>-24</sup> |
| Transmembrane protein 59-like                                                                 | TMEM59L       | 3.89 | 1.41x10 <sup>-11</sup> |
| Phosphatidylinositol-3,4,5-trisphosphate-dependent Rac exchange factor 2                      | PREX2         | 3.87 | 1.85x10 <sup>-19</sup> |
| Teneurin transmembrane protein 3                                                              | TENM3         | 3.78 | 6.89x10 <sup>-16</sup> |
| Neurotrophin 3                                                                                | NTF3          | 3.77 | 3.54x10 <sup>-12</sup> |
| ADAM metallopeptidase with thrombospondin type 1 motif, 14                                    | ADAMTS14      | 3.74 | 1.56x10 <sup>-14</sup> |
| Anillin, actin binding protein                                                                | ANLN          | 3.72 | 3.32x10 <sup>-17</sup> |
| Urocanate hydratase 1                                                                         | UROC1         | 3.67 | 6.29x10 <sup>-14</sup> |
| Protocadherin 10                                                                              | PCDH10        | 3.66 | 9.41x10 <sup>-12</sup> |
| Chloride intracellular channel 3                                                              | CLIC3         | 3.62 | 5.27x10 <sup>-13</sup> |
| Collagen, type VII, alpha 1                                                                   | COL7A1        | 3.59 | 1.51x10 <sup>-14</sup> |
| High mobility group AT-hook 2                                                                 | HMGA2         | 3.58 | 6.00x10 <sup>-09</sup> |
| Creatine kinase, brain                                                                        | CKB           | 3.57 | 5.55x10 <sup>-19</sup> |
| AC093850.2                                                                                    | AC093850.2    | 3.52 | 2.34x10 <sup>-09</sup> |
| Target of myb1 (chicken)-like 1                                                               | TOM1L1        | 3.50 | 1.93x10 <sup>-11</sup> |
| Hes-related family bHLH transcription factor with YRPW motif 2                                | HEY2          | 3.49 | 3.86x10 <sup>-13</sup> |
| Dual specificity phosphatase 4                                                                | DUSP4         | 3.48 | 1.38x10 <sup>-13</sup> |
| Versican                                                                                      | VCAN          | 3.46 | 6.97x10 <sup>-18</sup> |
| Eva-1 homolog A (C. elegans)                                                                  | EVA1A         | 3.38 | 7.24x10 <sup>-08</sup> |
| Early B-cell factor 3                                                                         | EBF3          | 3.33 | 1.58x10 <sup>-07</sup> |
| Leucine rich repeat containing 8 family, member E                                             | LRRC8E        | 3.32 | 8.84x10 <sup>-11</sup> |
| WNT1 inducible signaling pathway protein 1                                                    | WISP1         | 3.30 | 1.85x10 <sup>-19</sup> |
| FAT atypical cadherin 3                                                                       | FAT3          | 3.28 | 4.32x10 <sup>-10</sup> |
| Laminin, beta 3                                                                               | LAMB3         | 3.19 | 4.93x10 <sup>-13</sup> |
| Centrosomal protein 55kDa                                                                     | CEP55         | 3.18 | 2.20x10 <sup>-07</sup> |
| Solute carrier family 38, member 5                                                            | SLC38A5       | 3.11 | 1.16x10 <sup>-22</sup> |
| Hormonally up-regulated Neu-associated kinase                                                 | HUNK          | 3.11 | 4.78x10 <sup>-11</sup> |
| RP11-160A10.2                                                                                 | RP11-160A10.2 | 3.11 | 8.74x10 <sup>-08</sup> |
| Family with sequence similarity 132, member B                                                 | FAM132B       | 3.05 | 3.04x10 <sup>-06</sup> |
| Carbonic anhydrase XII                                                                        | CA12          | 3.03 | 6.11x10 <sup>-08</sup> |
| SLIT and NTRK-like family, member 6                                                           | SLITRK6       | 3.03 | 3.96x10 <sup>-06</sup> |
| T-box 3                                                                                       | TBX3          | 3.03 | 7.84x10 <sup>-07</sup> |
| Bone morphogenetic protein receptor, type IB                                                  | BMPR1B        | 3.01 | 2.16x10 <sup>-06</sup> |
| Potassium voltage-gated channel, delayed-rectifier, subfamily S, member 3                     | KCNS3         | 2.99 | 4.56x10 <sup>-09</sup> |
| Periostin, osteoblast specific factor                                                         | POSTN         | 2.99 | 2.38x10 <sup>-06</sup> |
| Serum/glucocorticoid regulated kinase 1                                                       | SGK1          | 2.97 | 6.71x10 <sup>-25</sup> |
| OCIA domain containing 2                                                                      | OCIAD2        | 2.97 | 3.16x10 <sup>-15</sup> |
| Fibroblast growth factor 9                                                                    | FGF9          | 2.94 | 1.62x10 <sup>-06</sup> |
| Non-SMC condensin I complex, subunit G                                                        | NCAPG         | 2.94 | 3.36x10 <sup>-06</sup> |
| Cyclin-dependent kinase 17                                                                    | CDK1          | 2.93 | 5.66x10 <sup>-07</sup> |

**Supplementary Table 4.** The top 50 down-regulated genes in damaged cartilage relative to intact cartilage

| Gene Name                                                   | Gene Symbol   | FC   | Adjusted p-value       |
|-------------------------------------------------------------|---------------|------|------------------------|
| Deleted in colorectal carcinoma                             | DCC           | 6.37 | 1.60x10 <sup>-25</sup> |
| Transmembrane protein 176A                                  | TMEM176A      | 3.72 | 1.96x10 <sup>-12</sup> |
| Tachykinin, precursor 1                                     | TAC1          | 3.35 | 4.26x10 <sup>-12</sup> |
| CD52 molecule                                               | CD52          | 3.33 | 1.25x10 <sup>-08</sup> |
| WNK lysine deficient protein kinase 2                       | WNK2          | 3.30 | 5.55x10 <sup>-19</sup> |
| Angiotensin II receptor, type 2                             | AGTR2         | 3.22 | 8.01x10 <sup>-07</sup> |
| Leucine rich repeat transmembrane neuronal 2                | LRRTM2        | 3.09 | 1.40x10 <sup>-11</sup> |
| Tumor necrosis factor receptor superfamily, member 4        | TNFRSF4       | 3.07 | 1.31x10 <sup>-08</sup> |
| Even-skipped homeobox 1                                     | EVX1          | 3.06 | 3.24x10 <sup>-06</sup> |
| Chromosome 1 open reading frame 173                         | C1orf173      | 3.04 | 4.90x10 <sup>-07</sup> |
| Solute carrier family 22                                    | SLC22A11      | 3.01 | 6.91x10 <sup>-08</sup> |
| Maternally expressed 3                                      | MEG3          | 2.99 | 8.80x10 <sup>-14</sup> |
| Calcium channel, voltage-dependent, alpha 2/delta subunit 2 | CACNA2D2      | 2.98 | 3.58x10 <sup>-17</sup> |
| Neurexin 2                                                  | NRXN2         | 2.94 | 7.82x10 <sup>-10</sup> |
| Calpain 6                                                   | CAPN6         | 2.90 | 4.15x10 <sup>-06</sup> |
| Seizure related 6 homolog (mouse)-like 2                    | SEZ6L         | 2.90 | 4.15x10 <sup>-08</sup> |
| Neurotrophic tyrosine kinase, receptor, type 3              | NTRK3         | 2.89 | 1.21x10 <sup>-05</sup> |
| 3-hydroxymethyl-3-methylglutaryl-CoA lyase-like 1           | HMGCLL1       | 2.83 | 1.84x10 <sup>-07</sup> |
| Insulin-like growth factor 2 mRNA binding protein 2         | IGF2          | 2.77 | 4.17x10 <sup>-18</sup> |
| NFAT activating protein with ITAM motif 1                   | NFAM1         | 2.74 | 4.49x10 <sup>-10</sup> |
| Transmembrane protein 176B                                  | TMEM176B      | 2.73 | 1.89x10 <sup>-06</sup> |
| Family with sequence similarity 101, member A               | FAM101A       | 2.73 | 2.37x10 <sup>-09</sup> |
| Mesothelin                                                  | MSLN          | 2.73 | 1.24x10 <sup>-05</sup> |
| Family with sequence similarity 198, member A               | FAM198A       | 2.72 | 1.78x10 <sup>-11</sup> |
| Dishevelled-binding antagonist of beta-catenin 1            | DACT1         | 2.72 | 2.83x10 <sup>-18</sup> |
| Sarcalumenin                                                | SRL           | 2.70 | 8.36x10 <sup>-06</sup> |
| Zinc finger protein 385C                                    | ZNF385C       | 2.68 | 3.58x10 <sup>-13</sup> |
| Myosin, heavy chain 14, non-muscle                          | MYH14         | 2.68 | 1.04x10 <sup>-09</sup> |
| Kinesin family member 1A                                    | KIF1A         | 2.66 | 2.09x10 <sup>-07</sup> |
| Cadherin-related family member 1                            | CDHR1         | 2.65 | 6.98x10 <sup>-08</sup> |
| R-spondin 3                                                 | RSPO3         | 2.65 | 1.73x10 <sup>-06</sup> |
| Regulator of calcineurin 2                                  | RCAN2         | 2.61 | 1.23x10 <sup>-08</sup> |
| RP11-588K22.2                                               | RP11-588K22.2 | 2.59 | 4.78x10 <sup>-10</sup> |
| ALX homeobox 4                                              | ALX4          | 2.58 | 7.28x10 <sup>-07</sup> |
| Small G protein signaling modulator 1                       | SGSM1         | 2.58 | 3.05x10 <sup>-08</sup> |
| LIM domain only 3 (rhombotin-like 2)                        | LMO3          | 2.57 | 1.61x10 <sup>-05</sup> |
| Guanylate cyclase 1, soluble, alpha 3                       | GUCY1A3       | 2.56 | 1.73x10 <sup>-14</sup> |
| PR domain containing 16                                     | PRDM16        | 2.55 | 3.18x10 <sup>-05</sup> |
| Myozenin 3                                                  | MYOZ3         | 2.53 | 5.39x10 <sup>-13</sup> |
| Long intergenic non-protein coding RNA 284                  | LINC00284     | 2.53 | 4.26x10 <sup>-07</sup> |
| Glutamate receptor, ionotropic, N-methyl D-aspartate 2C     | GRIN2C        | 2.52 | 2.22x10 <sup>-07</sup> |
| Serine/threonine kinase 32B                                 | STK32B        | 2.51 | 6.71x10 <sup>-25</sup> |
| SLIT and NTRK-like family, member 4                         | SLITRK4       | 2.50 | 6.55x10 <sup>-08</sup> |
| Cardiomyopathy associated 5                                 | CMYA5         | 2.48 | 3.94x10 <sup>-10</sup> |
| Chordin-like 2                                              | CHRD2         | 2.47 | 7.69x10 <sup>-10</sup> |
| Piezo-type mechanosensitive ion channel component 2         | PIEZO2        | 2.45 | 5.70x10 <sup>-21</sup> |
| RP11-561C5.3                                                | RP11-561C5.3  | 2.43 | 4.01x10 <sup>-05</sup> |
| Kyphoscoliosis peptidase                                    | KY            | 2.43 | 1.04x10 <sup>-04</sup> |
| Vitrin                                                      | VIT           | 2.43 | 3.19x10 <sup>-04</sup> |
| Retinoic acid receptor responder                            | RARRES2       | 2.42 | 1.52x10 <sup>-06</sup> |



**Supplementary Table 5. Upstream Transcription factor analysis.** Motif, Chip-Seq, text-mining and coexpression based methods were used to identify possible upstream transcription factors (TFs) controlling the expression of the up-regulated differentially expressed genes in damaged OA cartilage. For each TF detected by at least 2 methods the z-score or BH-adjusted p-value is shown for each tool as is the fold-change and p-value of the TF. TFs not included in a method are shown by NA while non-significant z-scores and p-values are shown by NS. Significantly differentially expressed TFs are highlighted in bold.

| Gene Symbol  | FC    | padj                   | Motif z-Score | Chip-Seq z-Score | Textmining padj        | Coexpression z-Score |
|--------------|-------|------------------------|---------------|------------------|------------------------|----------------------|
| <b>AHR</b>   | 1.75  | 0.01                   | NS            | NS               | 0.02                   | 3.71                 |
| BMP2         | 1.18  | 0.28                   | NA            | NA               | 9.48x10 <sup>-04</sup> | 4.83                 |
| BRCA1        | 1.32  | 0.16                   | NS            | NS               | 4.76x10 <sup>-04</sup> | 3.10                 |
| CTCF         | -1.05 | 0.71                   | NS            | 4.29             | 8.43x10 <sup>-03</sup> | NS                   |
| DNMT3B       | 1.28  | 0.45                   | NA            | NA               | 0.03                   | 3.34                 |
| <b>E2F1</b>  | 1.78  | 0.01                   | NS            | 4.01             | 3.39x10 <sup>-04</sup> | 3.11                 |
| E2F4         | -1.06 | 0.67                   | NS            | 3.95             | 3.39x10 <sup>-04</sup> | NS                   |
| EZH2         | 1.50  | 0.11                   | NA            | 3.12             | 0.02                   | 3.31                 |
| FOS          | -1.02 | 0.96                   | 4.94          | NS               | 0.03                   | 3.74                 |
| FOSB         | -1.07 | 0.87                   | 4.94          | NA               | NS                     | 3.55                 |
| <b>FOSL1</b> | 1.62  | 0.04                   | 4.94          | NS               | NS                     | 3.46                 |
| <b>FOXM1</b> | 2.35  | 1.38x10 <sup>-04</sup> | 3.14          | 3.47             | 1.24x10 <sup>-03</sup> | 3.01                 |
| HES1         | -1.20 | 0.24                   | 4.21          | NA               | 1.58x10 <sup>-03</sup> | NS                   |
| HOXA10       | -1.26 | 0.04                   | 3.39          | NA               | 4.76x10 <sup>-04</sup> | NS                   |
| ID3          | -1.09 | 0.70                   | NA            | NA               | 7.27x10 <sup>-03</sup> | 3.40                 |
| JUN          | 1.11  | 0.80                   | 4.05          | NS               | 2.50x10 <sup>-03</sup> | NS                   |
| JUNB         | 1.03  | 0.92                   | 4.94          | NS               | 0.04                   | 3.19                 |
| JUND         | 1.10  | 0.73                   | 4.94          | NS               | 0.03                   | NS                   |
| SNAI2        | -1.36 | 0.03                   | NS            | NA               | 0.06                   | 4.82                 |
| ZBTB16       | -1.09 | 0.78                   | NS            | NA               | 2.97x10 <sup>-03</sup> | 3.68                 |
